# Supplementary material for: Real-World Treatment Patterns, Clinical Outcomes, and Health Care Resource Utilization in Extensive-Stage Small Cell Lung Cancer in Canada
Source: MDPI journal article supplement (doi:10.3390/curroncol28040270), 2021-08-13
Supplement: s1 [file s1]

## Supplementary Materials

**Table S1.** List of rare treatments regimens (< 10 patients) included in the “other” category for each line of therapy.

| First Line                   | Second Line                                             | Third Line                          |
|------------------------------|---------------------------------------------------------|-------------------------------------|
| •CAV                         | •Cisplatin + Etoposide                                  | •Carboplatin + Etoposide            |
| •Topotecan alone             | •Etoposide alone                                        | •Cisplatin + Etoposide              |
| •Carboplatin + Pemetrexed    | •Carboplatin + Etoposide +<br>Durvalumab + Tremelimumab | •Etoposide alone                    |
| •Carboplatin + Vinorelbine   | •Cisplatin + Etoposide + Durvalumab                     | •Cisplatin + Etoposide + Durvalumab |
| •Carboplatin + Paclitaxel    | •Carboplatin + Doxorubicin                              | •Gefitinib                          |
| •Capecitabine + Temozolomide | •Capecitabine + Temozolomide                            | •Ipilimumab + nivolumab             |
| •Denosumab                   | •Pemetrexed                                             |                                     |
| •Gefitinib                   | •Denosumab                                              |                                     |
|                              | •Irinotecan                                             |                                     |

**Table S2.** Baseline demographics and clinical characteristics of the de novo extensive stage small cell lung cancer patients stratified by chemotherapy + radiation, chemotherapy alone, radiation alone, and best supportive care.

| Variable                                                                                              | Overall<br>(n = 1465)  | Chemo + Rad<br>(n = 523) | Chemo Alone<br>(n = 280) | Rad Alone<br>(n = 133) | No Chemo or<br>Rad<br>(n = 529) | P-value | SMD   |
|-------------------------------------------------------------------------------------------------------|------------------------|--------------------------|--------------------------|------------------------|---------------------------------|---------|-------|
| <b>Demographics</b>                                                                                   |                        |                          |                          |                        |                                 |         |       |
| Age, years (mean [SD])                                                                                | 69.07 (9.65)           | 66.24 (9.12)             | 68.65 (9.01)             | 68.74 (9.90)           | 72.19 (9.53)                    | <0.001  | 0.319 |
| ≥ 60 years (%)                                                                                        | 1191 (81.3)            | 391 (74.8)               | 231 (82.5)               | 107 (80.5)             | 462 (87.3)                      | <0.001  | 0.171 |
| Male (%)                                                                                              | 741 (50.6)             | 252 (48.2)               | 162 (57.9)               | 70 (52.6)              | 257 (48.6)                      | 0.042   | 0.111 |
| <b>Socioeconomic Status</b>                                                                           |                        |                          |                          |                        |                                 |         |       |
| Urban Residence (%)                                                                                   | 1138 (77.7)            | 422 (80.7)               | 212 (75.7)               | 99 (74.4)              | 405 (76.6)                      | 0.208   | 0.078 |
| Neighbourhood Annual Household<br>Income (mean[SD])                                                   | 36073.50<br>(13518.67) | 37057.66<br>(14672.93)   | 35664.22<br>(10438.85)   | 35728.49<br>(13807.24) | 35403.87<br>(13678.89)          | 0.22    | 0.062 |
| Categories Neighbourhood Annual<br>Household Income (%)                                               |                        |                          |                          |                        |                                 | 0.327   | 0.104 |
| 0-<35k                                                                                                | 834 (56.9)             | 279 (53.3)               | 155 (55.4)               | 80 (60.2)              | 320 (60.5)                      |         |       |
| 35-<45                                                                                                | 413 (28.2)             | 157 (30.0)               | 81 (28.9)                | 37 (27.8)              | 138 (26.1)                      |         |       |
| ≥ 45k                                                                                                 | 218 (14.9)             | 87 (16.6)                | 44 (15.7)                | 16 (12.0)              | 71 (13.4)                       |         |       |
| Proportion of Neighbourhood Residents<br>who achieved a Highschool Education or<br>Greater (mean[SD]) | 0.74 (0.11)            | 0.75 (0.11)              | 0.73 (0.11)              | 0.73 (0.11)            | 0.73 (0.11)                     | 0.173   | 0.076 |
| Categories of Neighbourhood Education<br>(%)                                                          |                        |                          |                          |                        |                                 | 0.502   | 0.114 |
| 0.00-<0.60                                                                                            | 166 (11.3)             | 53 (10.1)                | 35 (12.5)                | 14 (10.5)              | 64 (12.1)                       |         |       |
| 0.60-<0.70                                                                                            | 328 (22.4)             | 113 (21.6)               | 61 (21.8)                | 35 (26.3)              | 119 (22.5)                      |         |       |
| 0.70-<0.80                                                                                            | 510 (34.8)             | 171 (32.7)               | 101 (36.1)               | 44 (33.1)              | 194 (36.7)                      |         |       |
| 0.80+                                                                                                 | 461 (31.5)             | 186 (35.6)               | 83 (29.6)                | 40 (30.1)              | 152 (28.7)                      |         |       |
| <b>Comorbidity<sup>1</sup></b>                                                                        |                        |                          |                          |                        |                                 |         |       |
| Charlson Comorbidity Index (%)                                                                        |                        |                          |                          |                        |                                 | <0.001  | 0.277 |
| 0                                                                                                     | 601 (41.0)             | 268 (51.2)               | 101 (36.1)               | 50 (37.6)              | 182 (34.4)                      |         |       |
| 1                                                                                                     | 432 (29.5)             | 150 (28.7)               | 88 (31.4)                | 34 (25.6)              | 160 (30.2)                      |         |       |
| 2                                                                                                     | 225 (15.4)             | 64 (12.2)                | 46 (16.4)                | 30 (22.6)              | 85 (16.1)                       |         |       |

|                                                                                   |               |              |               |               |               |        |       |
|-----------------------------------------------------------------------------------|---------------|--------------|---------------|---------------|---------------|--------|-------|
| ≥ 3                                                                               | 207 (14.1)    | 41 (7.8)     | 45 (16.1)     | 19 (14.3)     | 102 (19.3)    |        |       |
| Chronic Obstructive Pulmonary Disease (%)                                         | 532 (36.3)    | 155 (29.6)   | 110 (39.3)    | 53 (39.8)     | 214 (40.5)    | 0.001  | 0.116 |
| Diabetes (%)                                                                      | 325 (22.2)    | 96 (18.4)    | 73 (26.1)     | 30 (22.6)     | 126 (23.8)    | 0.052  | 0.098 |
| Cardiovascular Disease (%)                                                        | 271 (18.5)    | 61 (11.7)    | 58 (20.7)     | 24 (18.0)     | 128 (24.2)    | <0.001 | 0.177 |
| <b>Indicators of health<sup>1*</sup></b>                                          |               |              |               |               |               |        |       |
| Hospitalized Within Year Prior to Diagnosis* (%)                                  | 243 (16.6)    | 47 (9.0)     | 44 (15.7)     | 25 (18.8)     | 127 (24.0)    | <0.001 | 0.221 |
| No. of Ambulatory Care Encounters Within Year Prior to Diagnosis *(mean [SD])     | 4.27 (9.90)   | 3.18 (6.23)  | 4.33 (10.25)  | 2.86 (3.96)   | 5.66 (13.04)  | <0.001 | 0.172 |
| No. of Health Practitioner Encounters Within Year Prior to Diagnosis *(mean [SD]) | 13.46 (14.73) | 10.98 (9.79) | 13.59 (12.64) | 12.01 (12.54) | 16.19 (19.21) | <0.001 | 0.201 |
| <b>Metastatic Sites</b>                                                           |               |              |               |               |               |        |       |
| Number of Metastatic Sites at Diagnosis                                           |               |              |               |               |               | 0.21   | 0.158 |
| 1                                                                                 | 548 (37.4)    | 197 (37.7)   | 88 (31.4)     | 51 (38.3)     | 212 (40.1)    |        |       |
| 2                                                                                 | 452 (30.9)    | 172 (32.9)   | 93 (33.2)     | 39 (29.3)     | 148 (28.0)    |        |       |
| 3                                                                                 | 251 (17.1)    | 86 (16.4)    | 55 (19.6)     | 24 (18.0)     | 86 (16.3)     |        |       |
| ≥ 4                                                                               | 212 (14.5)    | 68 (13.0)    | 43 (15.4)     | 18 (13.5)     | 83 (15.7)     |        |       |
| Missing                                                                           | 2 (0.1)       | 0 (0.0)      | 1 (0.4)       | 1 (0.8)       | 0 (0.0)       |        |       |
| <b>Sites of Metastasis at Diagnosis<sup>1</sup></b>                               |               |              |               |               |               |        |       |
| Hepatic                                                                           | 695 (47.4)    | 208 (39.8)   | 155 (55.4)    | 49 (36.8)     | 283 (53.5)    | <0.001 | 0.235 |
| Pleura                                                                            | 674 (46.0)    | 212 (40.5)   | 124 (44.3)    | 46 (34.6)     | 292 (55.2)    | <0.001 | 0.223 |
| Osseous                                                                           | 445 (30.4)    | 177 (33.8)   | 83 (29.6)     | 55 (41.4)     | 130 (24.6)    | <0.001 | 0.196 |
| Lymph nodes                                                                       | 282 (19.2)    | 103 (19.7)   | 68 (24.3)     | 19 (14.3)     | 92 (17.4)     | 0.048  | 0.138 |
| Brain                                                                             | 266 (18.2)    | 106 (20.3)   | 42 (15.0)     | 44 (33.1)     | 74 (14.0)     | <0.001 | 0.254 |
| Adrenals                                                                          | 262 (17.9)    | 99 (18.9)    | 52 (18.6)     | 27 (20.3)     | 84 (15.9)     | 0.483  | 0.059 |
| Pulmonary                                                                         | 199 (13.6)    | 77 (14.7)    | 42 (15.0)     | 14 (10.5)     | 66 (12.5)     | 0.446  | 0.078 |

<sup>1</sup> The number of individuals with concurrent renal, liver, and connective tissue disease as well as the number of individuals with prior cancer and number of individuals with peritoneum or bone marrow metastases were suppressed due to small cell counts

\*Proxy measures for performance status

Abbreviations: SD = standard deviation; SMD = standardised mean difference.

**Table S3.** Treatment characteristics stratified by de novo and recurrent ES-SCLC cases.

| Variable (%)                    | De novo (n=1465) | Recurrent (n=476) | P-Value | SMD   |
|---------------------------------|------------------|-------------------|---------|-------|
| <b>Overall Treatment</b>        |                  |                   | <0.001  | 0.809 |
| Chemotherapy + radiotherapy     | 523 (35.7)       | 50 (10.5)         |         |       |
| Chemotherapy alone              | 280 (19.1)       | 50 (10.5)         |         |       |
| Radiotherapy alone              | 133 (9.1)        | 35 (7.4)          |         |       |
| No chemotherapy or radiotherapy | 529 (36.1)       | 341 (71.6)        |         |       |
| <b>First-line Chemotherapy</b>  |                  |                   | <0.001  | 0.52  |
| Carboplatin + Etoposide         | 388 (48.3)       | 59 (59.0)         |         |       |
| Cisplatin + Etoposide           | 362 (45.1)       | 26 (26.0)         |         |       |

**Table S4.** Overall survival of de novo and recurrent ES-SCLC cases by line of therapy and treatment.

| Variable                | Median Survival<br>(95% CI) | 2-Year Survival<br>(95% CI) | 5-Year Survival<br>(95% CI) |
|-------------------------|-----------------------------|-----------------------------|-----------------------------|
| <b>1L Chemotherapy</b>  |                             |                             |                             |
| Overall                 |                             |                             |                             |
| De novo                 | 7.76 (7.27-8.15)            | 0.071 (0.055-0.092)         | 0.029 (0.018-0.047)         |
| Recurrent               | 8.52 (7.76-10.95)           | 0.087 (0.046-0.166)         | NA                          |
| Carboplatin + Etoposide |                             |                             |                             |
| De novo                 | 7.66 (7.23-8.28)            | 0.066 (0.045-0.098)         | 0.021 (0.009-0.050)         |
| Recurrent               | 9.57 (7.79-11.74)           | 0.068 (0.026-0.175)         | NA                          |
| Cisplatin + Etoposide   |                             |                             |                             |
| De novo                 | 8.22 (7.63-9.14)            | 0.085 (0.061-0.121)         | 0.041 (0.024-0.072)         |
| Recurrent               | 8.38 (7.63-12.53)           | 0.103 (0.031-0.342)         | NA                          |
| <b>2L Chemotherapy</b>  |                             |                             |                             |
| Overall                 |                             |                             |                             |
| De novo                 | 5.72 (4.83-7.07)            | 0.071 (0.055-0.092)         | 0.029 (0.018-0.047)         |
| Recurrent               | 6.12 (4.34-12.53)           | 0.087 (0.046-0.166)         | NA                          |

**Table S5.** Average health care resource utilization per patient per year among de novo ES-SCLC patients who did not initiate chemotherapy.

| Construct                      | Outcome                                   | Year 1 (n=662) | Year 2 (n=22) |
|--------------------------------|-------------------------------------------|----------------|---------------|
| Hospitalizations               | No. of Hospitalizations                   | 1.14           | 0.59          |
|                                | No. of Days Hospitalized                  | 15.39          | 19.55         |
| Ambulatory Care Services       | No. of Encounters                         | 3.09           | 5.32          |
|                                | No. of Emergency Encounters               | 1.18           | 1.00          |
| Cancer Physician Visits        | No. of Non-Emergency Encounters           | 1.91           | 4.32          |
|                                | No. of Visits                             | 2.23           | 1.68          |
|                                | No. of Medical Oncologist Visits          | 1.14           | 0.73          |
|                                | No. of Radiation Oncologist Visits        | 0.51           | <10           |
|                                | No. of General/Family Practitioner Visits | 0.15           | <10           |
| Non-Cancer Practitioner Visits | No. of Other Cancer Physician Visits      | 0.42           | 0.50          |
|                                | No. of Encounters                         | 20.74          | 26.41         |
|                                | No. of Claims                             | 43.60          | 49.73         |
| Radiation Therapy              | No. of Days of Therapy                    | 1.76           | 0.91          |
| Chemotherapy Cycles            | No. of Cycles                             | -              | -             |

**Table S6.** Average health care resource utilization per patient per year from second line therapy among de novo and recurrent ES-SCLC patients.

| Construct                      | Outcome                                   | Year 1 (n=169) | Year 2 (n=28) |
|--------------------------------|-------------------------------------------|----------------|---------------|
| Hospitalizations               | No. of Hospitalizations                   | 1.27           | 1.11          |
|                                | No. of Days Hospitalized                  | 13.01          | 14.00         |
| Ambulatory Care Services       | No. of Encounters                         | 6.59           | 3.68          |
|                                | No. of Emergency Encounters               | 2.63           | 1.57          |
| Cancer Physician Visits        | No. of Non-Emergency Encounters           | 3.96           | 2.11          |
|                                | No. of Visits                             | 8.72           | 3.68          |
|                                | No. of Medical Oncologist Visits          | 6.08           | 2.89          |
|                                | No. of Radiation Oncologist Visits        | 1.79           | 0.64          |
|                                | No. of General/Family Practitioner Visits | 0.44           | <10           |
| Non-Cancer Practitioner Visits | No. of Other Cancer Physician Visits      | 0.41           | <10           |
|                                | No. of Encounters                         | 21.25          | 22.54         |
|                                | No. of Claims                             | 41.86          | 41.36         |
| Radiation Therapy              | No. of Days of Therapy                    | 5.99           | 2.32          |
| Chemotherapy Cycles            | No. of Cycles                             | 7.40           | 2.04          |

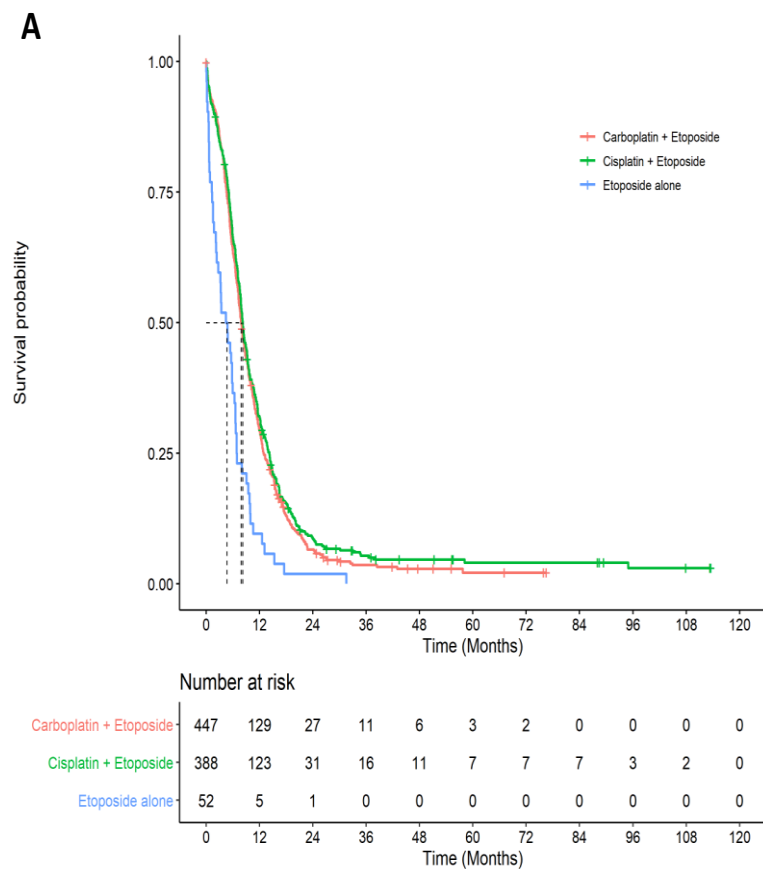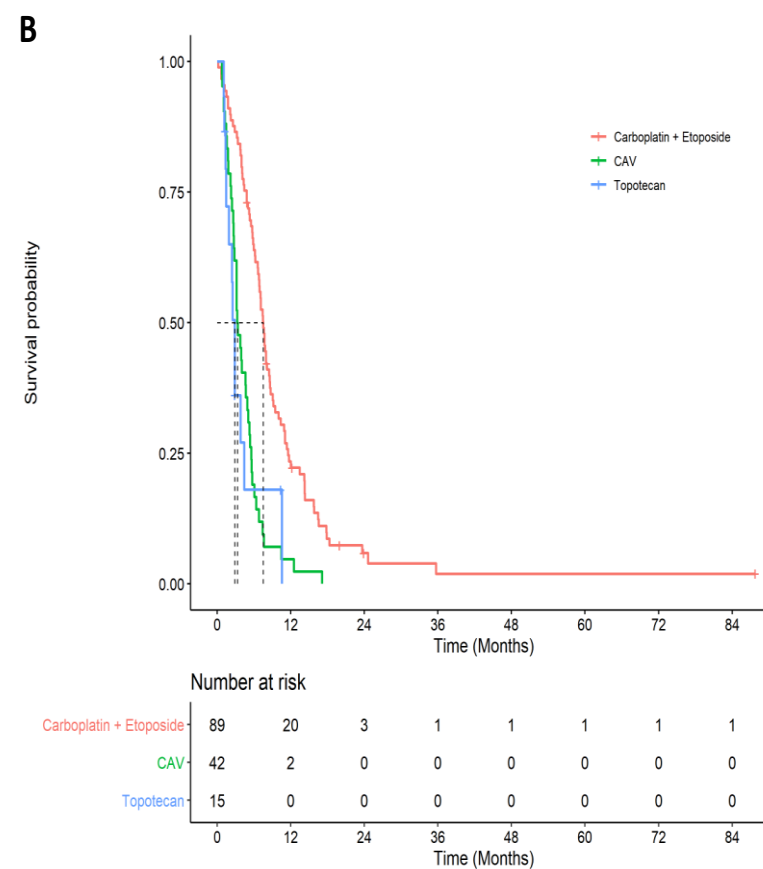

**Figure S1.** Long-term overall survival by treatment for first and second-line chemotherapy. **(A)** Long-term first-line overall survival by type of chemotherapy regimen. **(B)** Long-term second-line overall survival by type of chemotherapy regimen.
